# Supplementary figures and images for: A 3-D in vitro co-culture model of mammary gland involution
Source: Royal Society of Chemistry journal article supplement (doi:10.1039/c3ib40257f), 2014-01-01

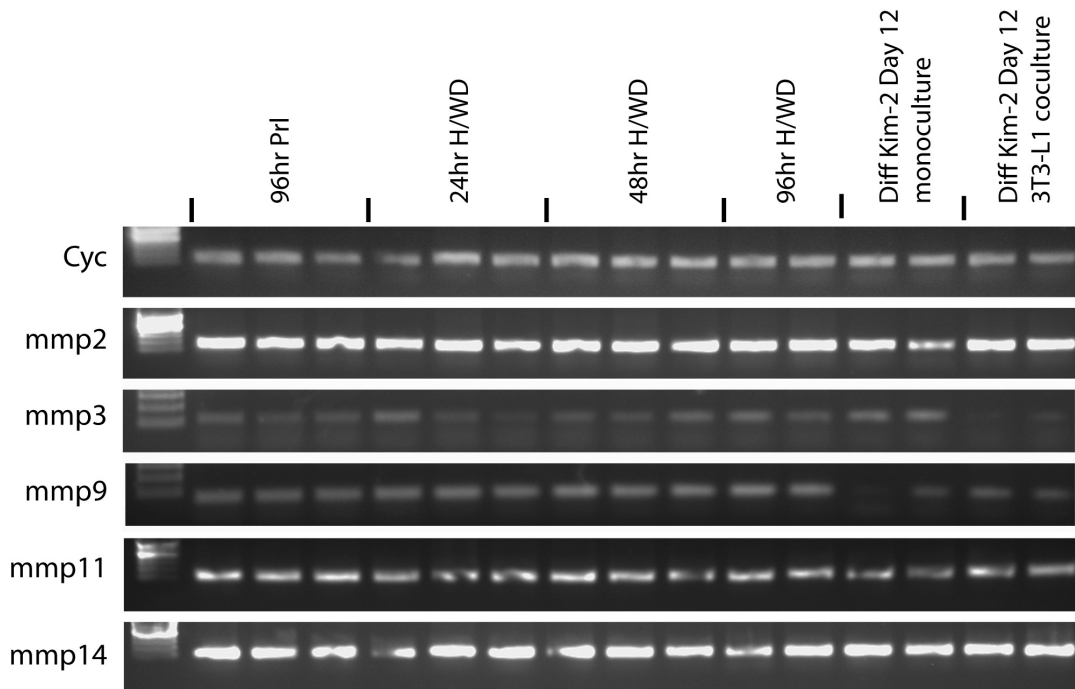

Supplement: c3ib40257f2.pdf [file c3ib40257f2.pdf]

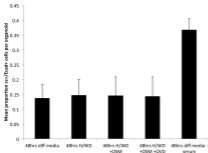

Supplement: c3ib40257f3.pdf [file c3ib40257f3.pdf]

a

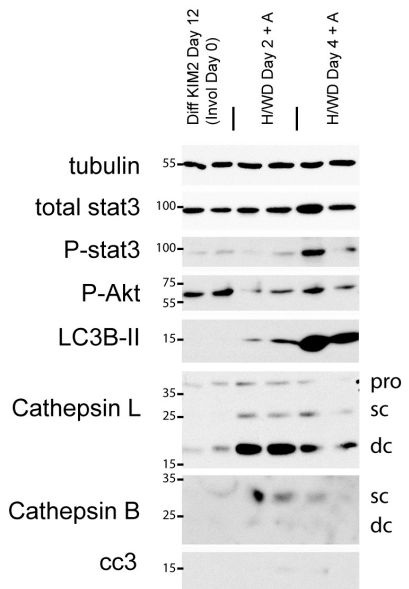

b

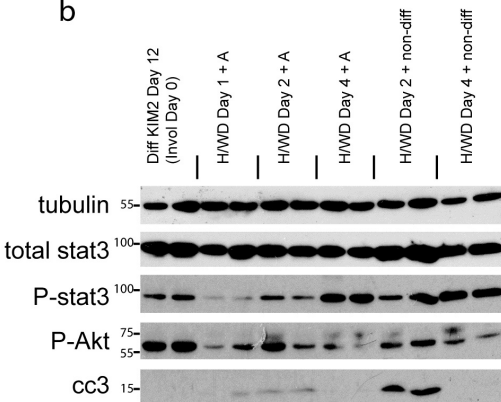

Supplement: c3ib40257f4.pdf [file c3ib40257f4.pdf]

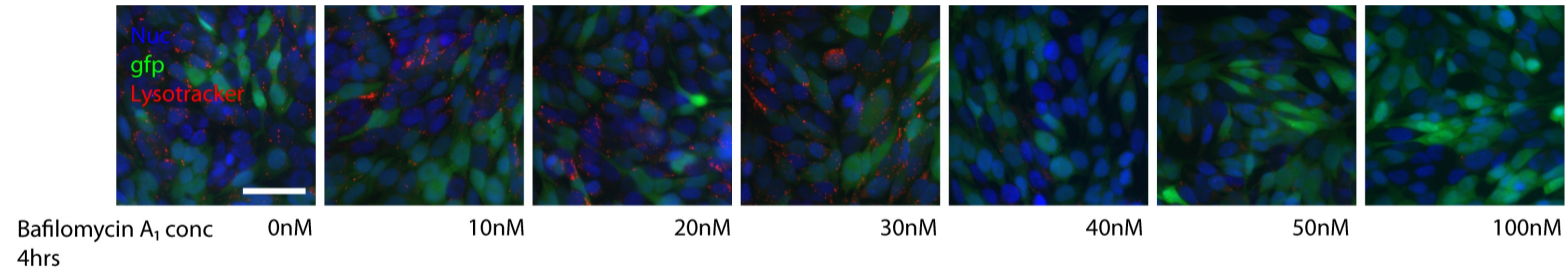

Supplement: c3ib40257f5.pdf [file c3ib40257f5.pdf]
